# Supplementary material
Source: PubMed Central journal article supplement (PMC4136338)
Supplement: JVI.01415-14_zjv999099392so5.pdf [file JVI.01415-14_zjv999099392so5.pdf]

|            | RV-HB15 1 | RV-HB15 2 | RV-HB15 3 | RV-HB15 4 | RV-HB15 5 | RV-Hd65 1 | RV-Hd65 2 | RV-Hd65 3 | RV-Hd65 4 | RV-Hd65 5 | RV-BADwt 1 | RV-BADwt 2 | RV-BADwt 3 | RV-BADwt 4 | RV-BADwt 5 | RV-KB14 1 | RV-KB14 2 | RV-KB14 3 | RV-KB14 4 | RV-KB14 5 | RV-HB5 1 | RV-HB5 2 | RV-HB5 3 | RV-HB5 4 | RV-HB5 5 |
|------------|-----------|-----------|-----------|-----------|-----------|-----------|-----------|-----------|-----------|-----------|------------|------------|------------|------------|------------|-----------|-----------|-----------|-----------|-----------|----------|----------|----------|----------|----------|
| RV-HB15 1  | 1.00      | 1.00      | 1.00      | 1.00      | 1.00      | 0.43      | 0.43      | 0.43      | 0.43      | 0.43      | 0.95       | 0.95       | 0.95       | 0.97       | 0.97       | 0.48      | 0.47      | 0.47      | 0.47      | 0.47      | 0.94     | 0.94     | 0.94     | 0.96     | 0.97     |
| RV-HB15 2  | 1.00      | 1.00      | 1.00      | 1.00      | 1.00      | 0.40      | 0.40      | 0.40      | 0.40      | 0.40      | 0.94       | 0.94       | 0.94       | 0.97       | 0.97       | 0.45      | 0.45      | 0.45      | 0.45      | 0.45      | 0.93     | 0.93     | 0.93     | 0.96     | 0.96     |
| RV-HB15 3  | 1.00      | 1.00      | 1.00      | 1.00      | 1.00      | 0.41      | 0.40      | 0.40      | 0.40      | 0.40      | 0.95       | 0.95       | 0.95       | 0.97       | 0.97       | 0.45      | 0.45      | 0.45      | 0.45      | 0.45      | 0.93     | 0.93     | 0.94     | 0.96     | 0.96     |
| RV-HB15 4  | 1.00      | 1.00      | 1.00      | 1.00      | 1.00      | 0.40      | 0.40      | 0.40      | 0.40      | 0.40      | 0.95       | 0.95       | 0.95       | 0.97       | 0.97       | 0.45      | 0.45      | 0.44      | 0.45      | 0.45      | 0.94     | 0.94     | 0.94     | 0.96     | 0.96     |
| RV-HB15 5  | 1.00      | 1.00      | 1.00      | 1.00      | 1.00      | 0.40      | 0.40      | 0.40      | 0.40      | 0.39      | 0.95       | 0.95       | 0.95       | 0.97       | 0.97       | 0.45      | 0.45      | 0.44      | 0.44      | 0.44      | 0.93     | 0.93     | 0.94     | 0.96     | 0.96     |
| RV-Hd65 1  | 0.43      | 0.40      | 0.41      | 0.40      | 0.40      | 1.00      | 1.00      | 1.00      | 1.00      | 1.00      | 0.43       | 0.43       | 0.42       | 0.42       | 0.41       | 0.97      | 0.97      | 0.97      | 0.97      | 0.97      | 0.60     | 0.60     | 0.59     | 0.60     | 0.59     |
| RV-Hd65 2  | 0.43      | 0.40      | 0.40      | 0.40      | 0.40      | 1.00      | 1.00      | 1.00      | 1.00      | 1.00      | 0.43       | 0.43       | 0.42       | 0.42       | 0.41       | 0.96      | 0.96      | 0.97      | 0.97      | 0.97      | 0.60     | 0.60     | 0.59     | 0.60     | 0.59     |
| RV-Hd65 3  | 0.43      | 0.40      | 0.40      | 0.40      | 0.40      | 1.00      | 1.00      | 1.00      | 1.00      | 1.00      | 0.43       | 0.43       | 0.42       | 0.42       | 0.41       | 0.96      | 0.96      | 0.97      | 0.97      | 0.97      | 0.60     | 0.60     | 0.59     | 0.60     | 0.59     |
| RV-Hd65 4  | 0.43      | 0.40      | 0.40      | 0.40      | 0.40      | 1.00      | 1.00      | 1.00      | 1.00      | 1.00      | 0.43       | 0.43       | 0.42       | 0.42       | 0.41       | 0.96      | 0.96      | 0.97      | 0.97      | 0.97      | 0.59     | 0.60     | 0.59     | 0.60     | 0.59     |
| RV-Hd65 5  | 0.43      | 0.40      | 0.40      | 0.40      | 0.39      | 1.00      | 1.00      | 1.00      | 1.00      | 1.00      | 0.43       | 0.43       | 0.42       | 0.42       | 0.41       | 0.96      | 0.96      | 0.97      | 0.97      | 0.97      | 0.59     | 0.60     | 0.59     | 0.60     | 0.58     |
| RV-BADwt 1 | 0.95      | 0.94      | 0.95      | 0.95      | 0.95      | 0.43      | 0.43      | 0.43      | 0.43      | 0.43      | 1.00       | 1.00       | 1.00       | 1.00       | 1.00       | 0.45      | 0.45      | 0.45      | 0.45      | 0.45      | 0.97     | 0.97     | 0.97     | 0.97     | 0.97     |
| RV-BADwt 2 | 0.95      | 0.94      | 0.95      | 0.95      | 0.95      | 0.43      | 0.43      | 0.43      | 0.43      | 0.43      | 1.00       | 1.00       | 1.00       | 1.00       | 1.00       | 0.44      | 0.44      | 0.44      | 0.44      | 0.44      | 0.97     | 0.97     | 0.97     | 0.97     | 0.97     |
| RV-BADwt 3 | 0.95      | 0.94      | 0.95      | 0.95      | 0.95      | 0.42      | 0.42      | 0.42      | 0.42      | 0.42      | 1.00       | 1.00       | 1.00       | 1.00       | 1.00       | 0.44      | 0.44      | 0.44      | 0.44      | 0.44      | 0.97     | 0.97     | 0.97     | 0.97     | 0.97     |
| RV-BADwt 4 | 0.97      | 0.97      | 0.97      | 0.97      | 0.97      | 0.42      | 0.42      | 0.42      | 0.42      | 0.42      | 1.00       | 1.00       | 1.00       | 1.00       | 1.00       | 0.43      | 0.43      | 0.44      | 0.43      | 0.44      | 0.97     | 0.97     | 0.97     | 0.96     | 0.97     |
| RV-BADwt 5 | 0.97      | 0.97      | 0.97      | 0.97      | 0.97      | 0.41      | 0.41      | 0.41      | 0.41      | 0.41      | 1.00       | 1.00       | 1.00       | 1.00       | 1.00       | 0.43      | 0.43      | 0.43      | 0.43      | 0.43      | 0.97     | 0.97     | 0.97     | 0.96     | 0.97     |
| RV-KB14 1  | 0.48      | 0.45      | 0.45      | 0.45      | 0.45      | 0.97      | 0.96      | 0.96      | 0.96      | 0.96      | 0.45       | 0.44       | 0.44       | 0.43       | 0.43       | 1.00      | 1.00      | 1.00      | 1.00      | 1.00      | 0.62     | 0.63     | 0.62     | 0.63     | 0.62     |
| RV-KB14 2  | 0.47      | 0.45      | 0.45      | 0.45      | 0.45      | 0.97      | 0.96      | 0.96      | 0.96      | 0.96      | 0.45       | 0.44       | 0.44       | 0.43       | 0.43       | 1.00      | 1.00      | 1.00      | 1.00      | 1.00      | 0.62     | 0.63     | 0.62     | 0.63     | 0.62     |
| RV-KB14 3  | 0.47      | 0.45      | 0.45      | 0.44      | 0.44      | 0.97      | 0.97      | 0.97      | 0.97      | 0.97      | 0.45       | 0.44       | 0.44       | 0.43       | 0.43       | 1.00      | 1.00      | 1.00      | 1.00      | 1.00      | 0.62     | 0.63     | 0.62     | 0.63     | 0.62     |
| RV-KB14 4  | 0.47      | 0.45      | 0.45      | 0.45      | 0.44      | 0.97      | 0.97      | 0.97      | 0.97      | 0.97      | 0.45       | 0.44       | 0.44       | 0.43       | 0.43       | 1.00      | 1.00      | 1.00      | 1.00      | 1.00      | 0.62     | 0.63     | 0.62     | 0.63     | 0.62     |
| RV-KB14 5  | 0.47      | 0.45      | 0.45      | 0.45      | 0.44      | 0.97      | 0.97      | 0.97      | 0.97      | 0.97      | 0.45       | 0.44       | 0.44       | 0.44       | 0.43       | 1.00      | 1.00      | 1.00      | 1.00      | 1.00      | 0.62     | 0.63     | 0.62     | 0.63     | 0.62     |
| RV-HB5 1   | 0.94      | 0.93      | 0.93      | 0.94      | 0.93      | 0.60      | 0.60      | 0.60      | 0.59      | 0.59      | 0.97       | 0.97       | 0.97       | 0.97       | 0.97       | 0.62      | 0.62      | 0.62      | 0.62      | 0.62      | 1.00     | 1.00     | 1.00     | 1.00     | 1.00     |
| RV-HB5 2   | 0.94      | 0.93      | 0.93      | 0.94      | 0.93      | 0.60      | 0.60      | 0.60      | 0.60      | 0.60      | 0.97       | 0.97       | 0.97       | 0.97       | 0.97       | 0.63      | 0.63      | 0.63      | 0.63      | 0.63      | 1.00     | 1.00     | 1.00     | 1.00     | 1.00     |
| RV-HB5 3   | 0.94      | 0.93      | 0.94      | 0.94      | 0.94      | 0.59      | 0.59      | 0.59      | 0.59      | 0.59      | 0.97       | 0.97       | 0.97       | 0.97       | 0.97       | 0.62      | 0.62      | 0.62      | 0.62      | 0.62      | 1.00     | 1.00     | 1.00     | 1.00     | 1.00     |
| RV-HB5 4   | 0.96      | 0.96      | 0.96      | 0.96      | 0.96      | 0.60      | 0.60      | 0.60      | 0.60      | 0.60      | 0.97       | 0.97       | 0.97       | 0.96       | 0.96       | 0.63      | 0.63      | 0.63      | 0.63      | 0.63      | 1.00     | 1.00     | 1.00     | 1.00     | 1.00     |
| RV-HB5 5   | 0.97      | 0.96      | 0.96      | 0.96      | 0.96      | 0.59      | 0.59      | 0.59      | 0.59      | 0.58      | 0.97       | 0.97       | 0.97       | 0.97       | 0.97       | 0.62      | 0.62      | 0.62      | 0.62      | 0.62      | 1.00     | 1.00     | 1.00     | 1.00     | 1.00     |

  

|            | RV-HB5 1/1 | RV-HB5 1/2 | RV-HB5 1/3 | RV-HB5 1/4 | RV-HB5 2/1 | RV-HB5 2/2 | RV-HB5 2/3 | RV-HB5 2/4 | RV-SB2 1/1 | RV-SB2 1/2 | RV-SB2 1/3 | RV-SB2 1/4 | RV-SB2 2/1 | RV-SB2 2/2 | RV-SB2 2/3 | RV-SB2 2/4 | RV-VM1 1/1 | RV-VM1 1/2 | RV-VM1 1/3 | RV-VM1 1/4 | RV-VM1 2/1 | RV-VM1 2/2 | RV-VM1 2/3 | RV-VM1 2/4 |
|------------|------------|------------|------------|------------|------------|------------|------------|------------|------------|------------|------------|------------|------------|------------|------------|------------|------------|------------|------------|------------|------------|------------|------------|------------|
| RV-HB5 1/1 | 1.00       | 1.00       | 1.00       | 1.00       | 0.87       | 0.91       | 0.89       | 0.92       | 0.72       | 0.72       | 0.71       | 0.73       | 0.71       | 0.71       | 0.69       | 0.70       | 0.94       | 0.94       | 0.94       | 0.92       | 0.87       | 0.86       | 0.88       | 0.87       |
| RV-HB5 1/2 | 1.00       | 1.00       | 0.99       | 1.00       | 0.87       | 0.91       | 0.89       | 0.91       | 0.71       | 0.71       | 0.70       | 0.71       | 0.69       | 0.69       | 0.68       | 0.68       | 0.93       | 0.94       | 0.94       | 0.92       | 0.87       | 0.86       | 0.88       | 0.86       |
| RV-HB5 1/3 | 1.00       | 0.99       | 1.00       | 1.00       | 0.88       | 0.91       | 0.90       | 0.91       | 0.71       | 0.70       | 0.71       | 0.71       | 0.69       | 0.69       | 0.66       | 0.69       | 0.93       | 0.93       | 0.94       | 0.92       | 0.87       | 0.86       | 0.87       | 0.87       |
| RV-HB5 1/4 | 1.00       | 1.00       | 1.00       | 1.00       | 0.87       | 0.91       | 0.89       | 0.91       | 0.70       | 0.69       | 0.69       | 0.70       | 0.68       | 0.68       | 0.66       | 0.68       | 0.93       | 0.93       | 0.93       | 0.92       | 0.86       | 0.86       | 0.87       | 0.86       |
| RV-HB5 2/1 | 0.87       | 0.87       | 0.88       | 0.87       | 1.00       | 0.97       | 0.98       | 0.98       | 0.63       | 0.62       | 0.64       | 0.63       | 0.62       | 0.62       | 0.59       | 0.63       | 0.81       | 0.81       | 0.82       | 0.81       | 0.80       | 0.81       | 0.81       | 0.81       |
| RV-HB5 2/2 | 0.91       | 0.91       | 0.91       | 0.91       | 0.97       | 1.00       | 0.99       | 0.99       | 0.68       | 0.67       | 0.67       | 0.68       | 0.68       | 0.68       | 0.67       | 0.67       | 0.86       | 0.87       | 0.86       | 0.84       | 0.83       | 0.83       | 0.84       | 0.84       |
| RV-HB5 2/3 | 0.89       | 0.89       | 0.90       | 0.89       | 0.98       | 0.99       | 1.00       | 0.99       | 0.66       | 0.65       | 0.68       | 0.66       | 0.65       | 0.65       | 0.62       | 0.66       | 0.84       | 0.83       | 0.85       | 0.84       | 0.82       | 0.82       | 0.82       | 0.83       |
| RV-HB5 2/4 | 0.92       | 0.91       | 0.91       | 0.91       | 0.98       | 0.99       | 0.99       | 1.00       | 0.69       | 0.68       | 0.68       | 0.69       | 0.67       | 0.67       | 0.66       | 0.67       | 0.87       | 0.87       | 0.87       | 0.86       | 0.83       | 0.82       | 0.84       | 0.83       |
| RV-SB2 1/1 | 0.72       | 0.71       | 0.71       | 0.70       | 0.63       | 0.68       | 0.66       | 0.69       | 1.00       | 0.99       | 0.98       | 1.00       | 0.98       | 0.98       | 0.96       | 0.97       | 0.88       | 0.86       | 0.87       | 0.89       | 0.65       | 0.64       | 0.68       | 0.65       |
| RV-SB2 1/2 | 0.72       | 0.71       | 0.70       | 0.69       | 0.62       | 0.67       | 0.65       | 0.68       | 0.99       | 1.00       | 0.98       | 0.99       | 0.97       | 0.98       | 0.96       | 0.97       | 0.87       | 0.86       | 0.87       | 0.89       | 0.64       | 0.63       | 0.67       | 0.64       |
| RV-SB2 1/3 | 0.71       | 0.70       | 0.71       | 0.69       | 0.64       | 0.67       | 0.68       | 0.68       | 0.98       | 0.98       | 1.00       | 0.98       | 0.96       | 0.96       | 0.91       | 0.98       | 0.85       | 0.82       | 0.86       | 0.89       | 0.64       | 0.63       | 0.65       | 0.64       |
| RV-SB2 1/4 | 0.73       | 0.71       | 0.71       | 0.70       | 0.63       | 0.68       | 0.66       | 0.69       | 1.00       | 0.99       | 0.98       | 1.00       | 0.98       | 0.98       | 0.96       | 0.98       | 0.87       | 0.86       | 0.86       | 0.89       | 0.65       | 0.64       | 0.68       | 0.65       |
| RV-SB2 2/1 | 0.71       | 0.69       | 0.69       | 0.68       | 0.62       | 0.68       | 0.65       | 0.67       | 0.98       | 0.97       | 0.96       | 0.98       | 1.00       | 1.00       | 0.97       | 0.99       | 0.85       | 0.84       | 0.84       | 0.86       | 0.69       | 0.67       | 0.71       | 0.69       |
| RV-SB2 2/2 | 0.71       | 0.69       | 0.69       | 0.68       | 0.62       | 0.68       | 0.65       | 0.67       | 0.98       | 0.98       | 0.96       | 0.98       | 1.00       | 1.00       | 0.98       | 0.99       | 0.86       | 0.85       | 0.84       | 0.86       | 0.68       | 0.66       | 0.70       | 0.68       |
| RV-SB2 2/3 | 0.69       | 0.68       | 0.66       | 0.66       | 0.59       | 0.67       | 0.62       | 0.66       | 0.96       | 0.96       | 0.91       | 0.96       | 0.97       | 0.98       | 1.00       | 0.94       | 0.85       | 0.85       | 0.82       | 0.83       | 0.66       | 0.63       | 0.69       | 0.65       |
| RV-SB2 2/4 | 0.70       | 0.68       | 0.69       | 0.68       | 0.63       | 0.67       | 0.66       | 0.67       | 0.97       | 0.97       | 0.98       | 0.98       | 0.99       | 0.99       | 0.94       | 1.00       | 0.84       | 0.82       | 0.83       | 0.86       | 0.68       | 0.67       | 0.69       | 0.68       |
| RV-VM1 1/1 | 0.94       | 0.93       | 0.93       | 0.93       | 0.81       | 0.86       | 0.84       | 0.87       | 0.88       | 0.87       | 0.85       | 0.87       | 0.85       | 0.86       | 0.85       | 0.84       | 1.00       | 1.00       | 0.99       | 0.99       | 0.85       | 0.84       | 0.87       | 0.85       |
| RV-VM1 1/2 | 0.94       | 0.94       | 0.93       | 0.93       | 0.81       | 0.87       | 0.83       | 0.87       | 0.86       | 0.86       | 0.82       | 0.86       | 0.84       | 0.85       | 0.85       | 0.82       | 1.00       | 1.00       | 0.99       | 0.98       | 0.86       | 0.84       | 0.88       | 0.86       |
| RV-VM1 1/3 | 0.94       | 0.94       | 0.94       | 0.93       | 0.82       | 0.86       | 0.85       | 0.87       | 0.87       | 0.87       | 0.86       | 0.86       | 0.84       | 0.84       | 0.82       | 0.83       | 0.99       | 0.99       | 1.00       | 0.99       | 0.85       | 0.84       | 0.87       | 0.86       |
| RV-VM1 1/4 | 0.92       | 0.92       | 0.92       | 0.92       | 0.81       | 0.84       | 0.84       | 0.86       | 0.89       | 0.89       | 0.89       | 0.89       | 0.86       | 0.86       | 0.83       | 0.86       | 0.99       | 0.98       | 0.99       | 1.00       | 0.84       | 0.83       | 0.86       | 0.84       |
| RV-VM1 2/1 | 0.87       | 0.87       | 0.87       | 0.86       | 0.80       | 0.83       | 0.82       | 0.83       | 0.65       | 0.64       | 0.64       | 0.65       | 0.69       | 0.68       | 0.66       | 0.68       | 0.85       | 0.86       | 0.85       | 0.84       | 1.00       | 0.99       | 1.00       | 1.00       |
| RV-VM1 2/2 | 0.86       | 0.86       | 0.86       | 0.86       | 0.81       | 0.83       | 0.82       | 0.82       | 0.64       | 0.63       | 0.63       | 0.64       | 0.67       | 0.66       | 0.63       | 0.67       | 0.84       | 0.84       | 0.84       | 0.83       | 0.99       | 1.00       | 0.99       | 1.00       |
| RV-VM1 2/3 | 0.88       | 0.88       | 0.87       | 0.87       | 0.81       | 0.84       | 0.82       | 0.84       | 0.68       | 0.67       | 0.65       | 0.68       | 0.71       | 0.70       | 0.69       | 0.69       | 0.87       | 0.88       | 0.87       | 0.86       | 1.00       | 0.99       | 1.00       | 0.99       |
| RV-VM1 2/4 | 0.87       | 0.86       | 0.87       | 0.86       | 0.81       | 0.84       | 0.83       | 0.83       | 0.65       | 0.64       | 0.64       | 0.65       | 0.69       | 0.68       | 0.65       | 0.68       | 0.85       |            |            |            |            |            |            |            |
